# Supplementary material for: Transcriptomic profiling of hemp bast fibres at different developmental stages
Source: PubMed Central journal article supplement (PMC5504027; doi:10.1038/s41598-017-05200-8), 2017-07-10
Supplement: 41598_2017_5200_MOESM1_ESM.pdf [file 41598_2017_5200_MOESM1_ESM.pdf]

## Supplementary Information

### Transcriptomic profiling of hemp bast fibres at different developmental stages

Guerriero Gea<sup>1\*</sup>, Behr Marc<sup>1,2</sup>, Legay Sylvain<sup>1</sup>, Mangeot-Peter Lauralie<sup>1,3</sup>, Zorzan Simone<sup>1</sup>, Ghoniem Mohammad<sup>1</sup>, Hausman Jean-Francois<sup>1</sup>

<sup>1</sup> Luxembourg Institute of Science and Technology (LIST), Environmental Research and Innovation (ERIN) Department, Esch/Alzette, L-4362, Luxembourg.

<sup>2</sup> Université catholique de Louvain, Groupe de Recherche en Physiologie Végétale, Earth and Life Institute-Agronomy, Louvain-la-Neuve, B-1348, Belgium.

<sup>3</sup>Present address: Institut National de la Recherche Agronomique, Université de Lorraine, UMR 1136, Interactions Arbres-Microorganismes, Champenoux, F-54280, France.

\* Author to whom correspondence should be addressed: [gea.guerriero@list.lu](mailto:gea.guerriero@list.lu)

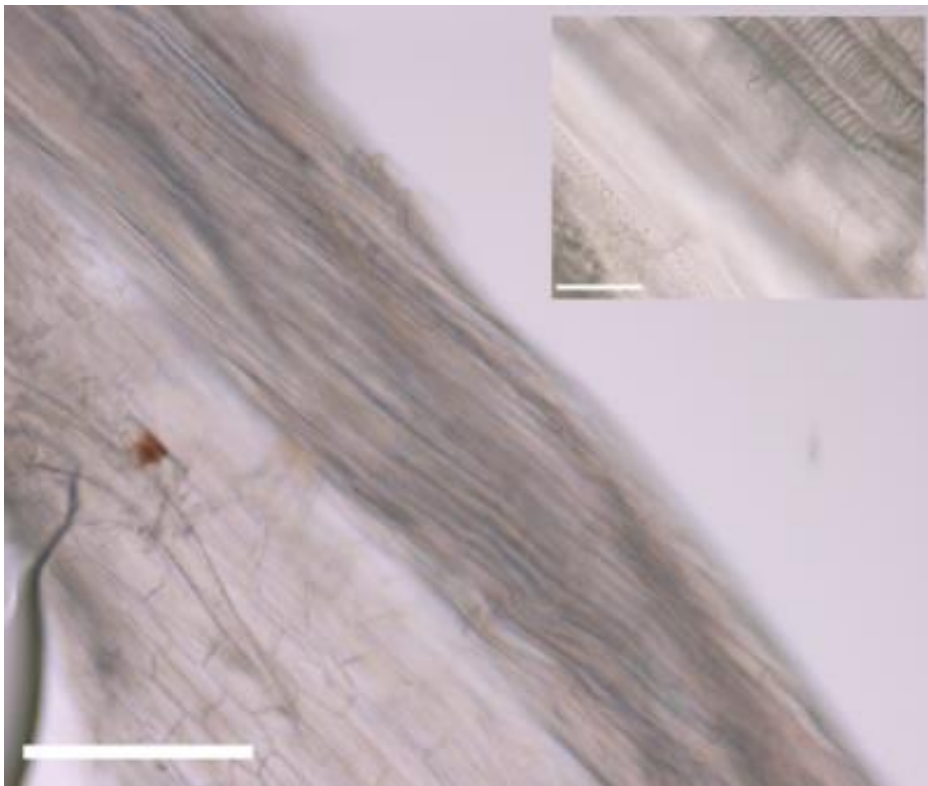

**Supplementary Figure 1:** Microscopic inspection of fibres isolated from the TOP region of hemp stems. In the bast fibre preparation, some sporadic non-glandular trichomes, parenchymatic and xylem cells (annular and pitted; inset) were present. Bars are 100  $\mu\text{m}$  and 50  $\mu\text{m}$  in the inset.

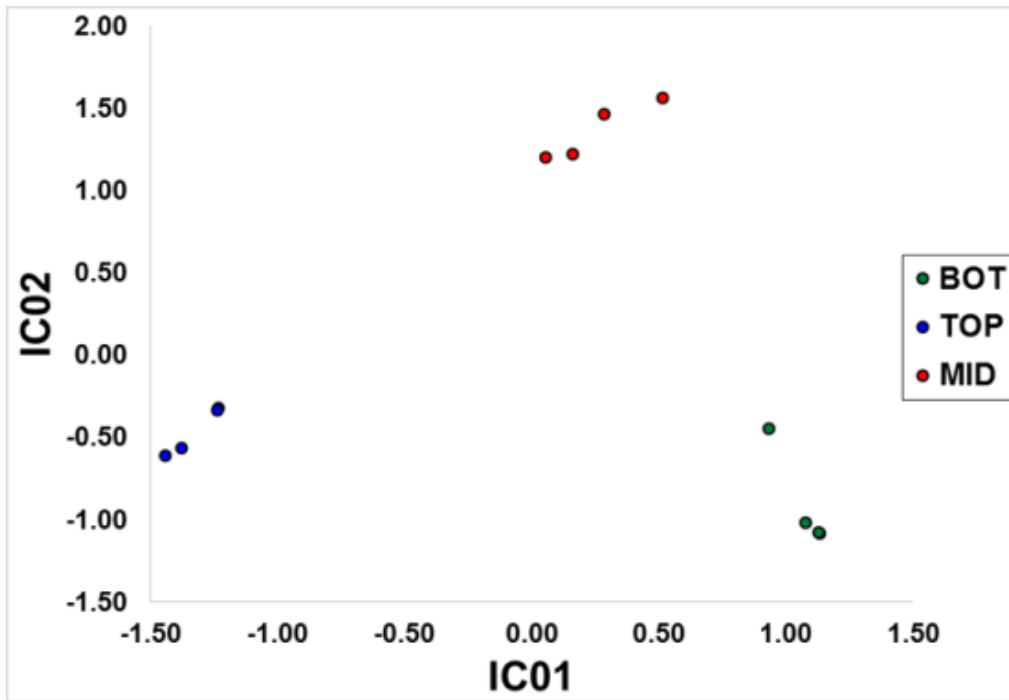

**Supplementary Figure 2:** ICA of the four biological replicates for the bast fibres sampled at the top (TOP, blue), middle (MID, red) and bottom (BOT, green).

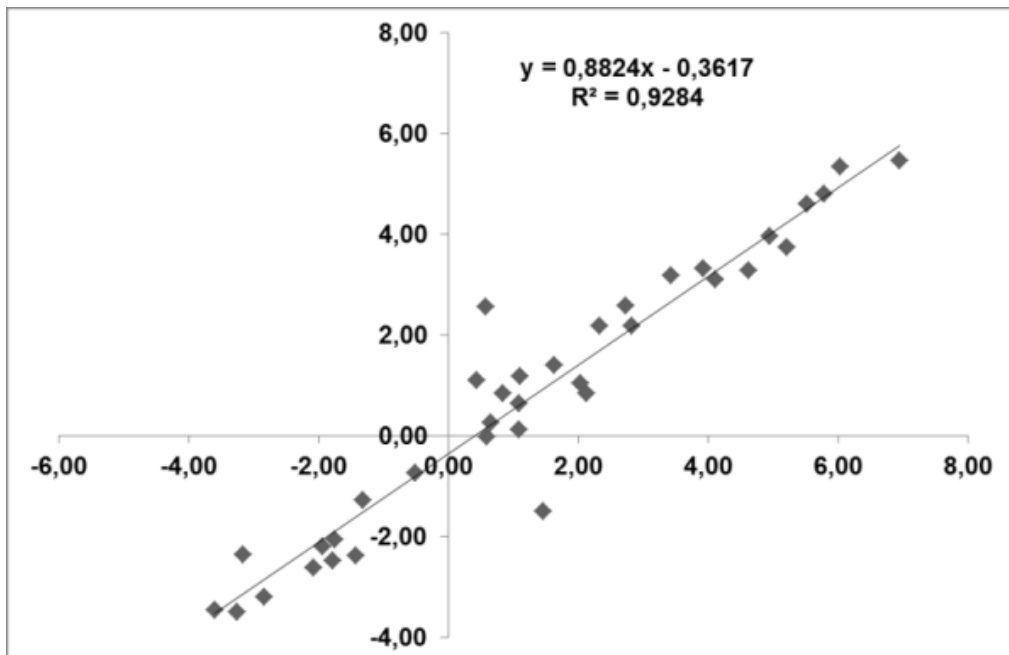

**Supplementary Figure 3:** Validation using RT-qPCR. The analysis was carried out on 12 representative genes (details in Supplementary Dataset File).
